# Supplementary material for: Persisting Smell and Taste Disorders in Patients Who Recovered from SARS-CoV-2 Virus Infection—Data from the Polish PoLoCOV-CVD Study
Source: MDPI journal article supplement (doi:10.3390/v14081763), 2022-08-12
Supplement: s1 [file s1]

**Table S1.** Patient characteristics after propensity score matching – differences between the group with and without persistent smell and taste disorders.

|                                                                             | Smell and taste disorders<br>(n = 98) | No smell and taste disorders<br>(n=980) | p-value* |
|-----------------------------------------------------------------------------|---------------------------------------|-----------------------------------------|----------|
| Age**                                                                       | 49.19±14.68                           | 28.5±13.02                              | 0.698    |
| Women                                                                       | 32 (32.65%)                           | 353 (36.4)                              | 0.863    |
| Men                                                                         | 66 (67.35%)                           | 637 (63.4)                              |          |
| Weight **                                                                   | 76.58±15.64                           | 78.19±18.04                             | 0.372    |
| Height **                                                                   | 169.13±8.38                           | 168.87±8.63                             | 0.401    |
| BMI <30                                                                     | 76 (77.55%)                           | 696 (70.6)                              | 0.234    |
| BMI ≥30                                                                     | 22 (22.45%)                           | 284 (29.4)                              |          |
| Number of comorbidities **                                                  | 1.29±1.44                             | 1.52±1.60                               | 0.072    |
| Comorbidities                                                               | 56 (57.14%)                           | 624 (63.7)                              | 0.094    |
| Hypertension (HT)                                                           | 24 (24.49%)                           | 276 (28.2)                              | 0.467    |
| Thyroid disease                                                             | 17 (17.35%)                           | 181 (18.5)                              | 0.451    |
| Hyperlipidemia                                                              | 14 (14.29%)                           | 170 (17.4)                              | 0.814    |
| Diabetes mellitus (DM)                                                      | 11 (11.22%)                           | 68 (6.9)                                | 0.662    |
| Coronary artery disease                                                     | 3 (3.06%)                             | 36 (3.7)                                | 0.581    |
| Previous myocardial infarction (MI)                                         | 1 (1.02%)                             | 12 (1.2)                                | 0.778    |
| Heart failure                                                               | 0 (0.00%)                             | 13 (1.3)                                | 0.710    |
| Venous thromboembolism                                                      | 1 (1.02%)                             | 13 (1.3)                                | 0.650    |
| Asthma                                                                      | 7 (7.14%)                             | 89 (9.08)                               | 0.884    |
| COPD                                                                        | 1 (1.02%)                             | 18 (1.9)                                | 0.756    |
| Flu vaccinations in the previous season                                     | 3 (3.06%)                             | 64 (6.6)                                | 0.175    |
| Vaccination against COVID-19 (n=532) / (n=23 for smell and taste disorders) | 17 (73.91%)                           | 369 (69.5)                              | 0.652    |

BMI – Body Mass Index, HT – hypertension, DM – diabetes mellitus, MI – myocardial infarction, COPD – chronic obstructive pulmonary disease, \* Chi-square test – distribution among patients with/without persistent smell and taste disorders, \*\* Mann–Whitney U test.

**Table S2.** COVID-19 course analysis in groups with and without persistent smell and taste disorders. Comparison after propensity score matching.

|                    | Smell and<br>taste disorders<br>(n = 98) | No smell and<br>taste disorders<br>(n=980) | p-value* |
|--------------------|------------------------------------------|--------------------------------------------|----------|
| Pandemic wave      |                                          |                                            |          |
| 2                  | 67 (68.37%)                              | 617 (62.9%)                                | 0.051    |
| 3                  | 21 (21.43%)                              | 293 (29.9%)                                |          |
| 4                  | 10 (10.20%)                              | 70 (7.2%)                                  |          |
| Course of COVID-19 |                                          |                                            |          |
| 0                  | 8 (8.16%)                                | 78 (8.0)                                   | 0.853    |
| 1                  | 35 (35.71%)                              | 314 (32.0)                                 |          |
| 2                  | 25 (25.51%)                              | 276 (28.2)                                 |          |
| 3                  | 30 (30.61%)                              | 312 (31.8)                                 |          |
| Home isolation     | 95 (96.94%)                              | 884 (90.2%)                                | 0.115    |

|                                                |             |               |        |
|------------------------------------------------|-------------|---------------|--------|
| <b>Hospitalisation without pneumonia</b>       | 0 (0.00%)   | 12 (1.2%)     | 0.778  |
| <b>Hospitalisation with pneumonia</b>          | 1 (1.02%)   | 73 (7.4%)     | 0.128  |
| <b>Hospitalisation with ICU</b>                | 0 (0.00%)   | 4 (0.5)       | 0.647  |
| <b>Symptoms during COVID-19</b>                |             |               |        |
| <b>Temperature &lt;36.6</b>                    | 20 (20.41%) | 142 (14.5%)   | 0.312  |
| <b>Temperature &lt;37.5</b>                    | 23 (23.47%) | 226 (23.1%\$) | 0.899  |
| <b>Temperature &gt; 37.5</b>                   | 46 (46.94%) | 527 (53.8%)   | 0.413  |
| <b>Cough</b>                                   | 54 (55.10%) | 612 (62.5)    | 0.457  |
| <b>Dyspnoea</b>                                | 45 (45.92%) | 442 (45.1%)   | 0.952  |
| <b>Olfactory dysfunction</b>                   | 10 (10.20%) | 99 (10.2%)    | 0.953  |
| <b>Taste dysfunction</b>                       | 1 (1.02%)   | 55 (5.7%)     | 0.092  |
| <b>Smell and taste disorders</b>               | 82 (83.67%) | 473 (48.3%)   | <0.001 |
| <b>Significant fatigue</b>                     | 69 (70.41%) | 738 (75.4%)   | 0.503  |
| <b>Chest pain</b>                              | 45 (45.92%) | 452 (46.2%)   | 0.516  |
| <b>Back muscle pain</b>                        | 50 (51.02%) | 526 (53.7%)   | 0.713  |
| <b>Leg muscle pain</b>                         | 48 (48.98%) | 411 (42.0%)   | 0.051  |
| <b>Headache</b>                                | 59 (60.20%) | 611 (62.3%)   | 0.470  |
| <b>Arthralgia</b>                              | 50 (51.02%) | 404 (41.2%)   | 0.021  |
| <b>Diarrhoea</b>                               | 21 (21.43%) | 187 (19.1%)   | 0.540  |
| <b>Vomiting</b>                                | 4 (4.08%)   | 72 (7.4%)     | 0.909  |
| <b>Chills</b>                                  | 36 (36.73%) | 378 (38.6%)   | 0.932  |
| <b>Labile blood pressure values</b>            | 16 (16.33%) | 134 (13.7%)   | 0.850  |
| <b>Hearing dysfunction</b>                     | 14 (14.29%) | 95 (9.7%)     | 0.219  |
| <b>Duration of symptoms (number of days)**</b> | 10.43±5.49  | 10.64±5.64    | 0.642  |
| <b>Number of symptoms**</b>                    | 8.87±3.65   | 8.29±3.63     | 0.021  |

ICU – intensive care unit, \*Chi-square test – distribution among people with/without persistent smell and taste disorders. \*\* the Mann–Whitney U test.
